# Supplementary material for: Polypyrrole functionalized MoS2 for sensitive and simultaneous determination of heavy metal ions in water
Source: PubMed Central journal article supplement (PMC11697259; doi:10.1039/d4ra05688d), 2025-01-03
Supplement: RA-015-D4RA05688D-s001.pdf [file RA-015-D4RA05688D-s001.pdf]

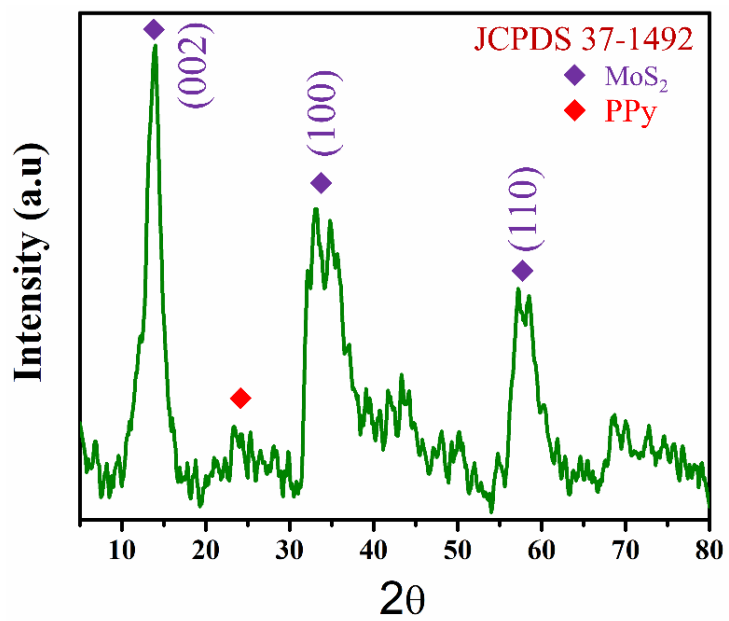

**Fig. 1** XRD of PPy/MoS<sub>2</sub>
